# Supplementary material
Source: PubMed Central journal article supplement (PMC6475201)
Supplement: NIHMS756663-supplement-1.pdf [file NIHMS756663-supplement-1.pdf]

(A)

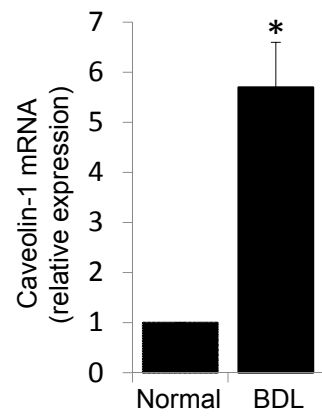

(B)

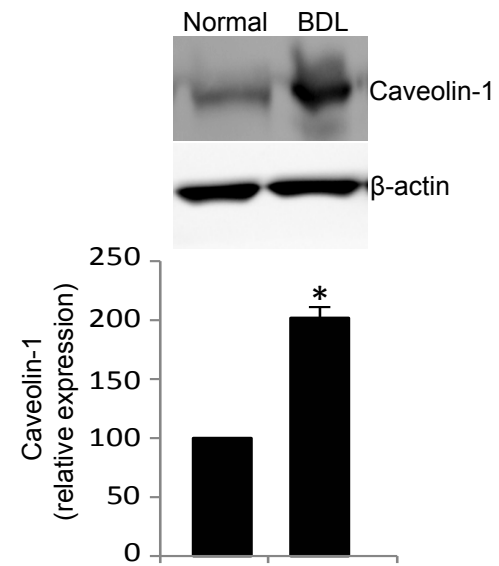

Figure 1  
Singh et al.

(A)

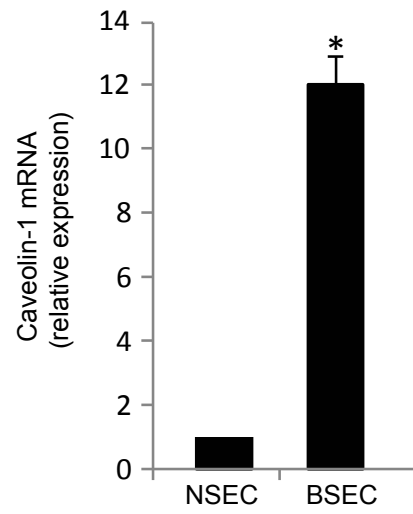

(B)

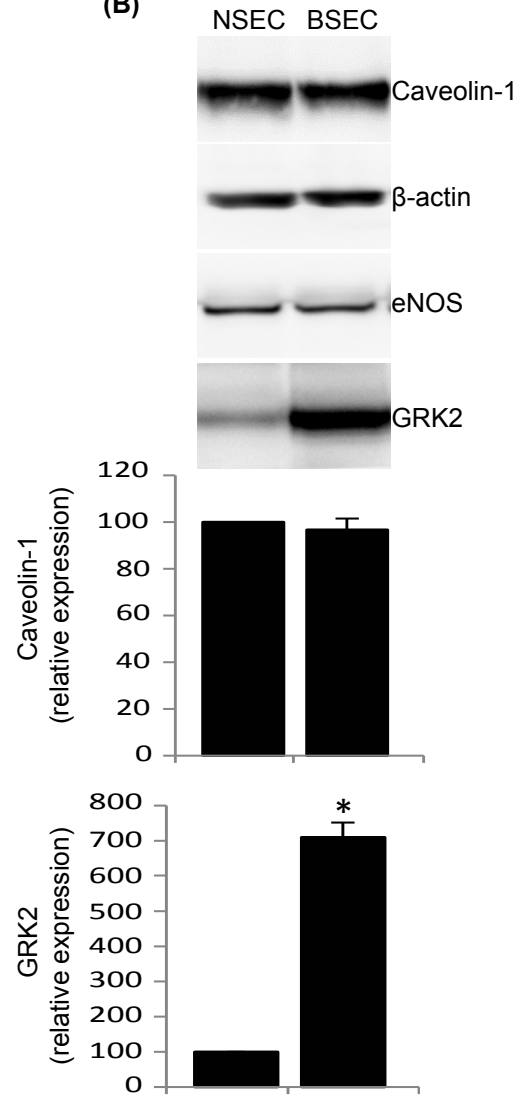

Figure 2  
Singh et al.

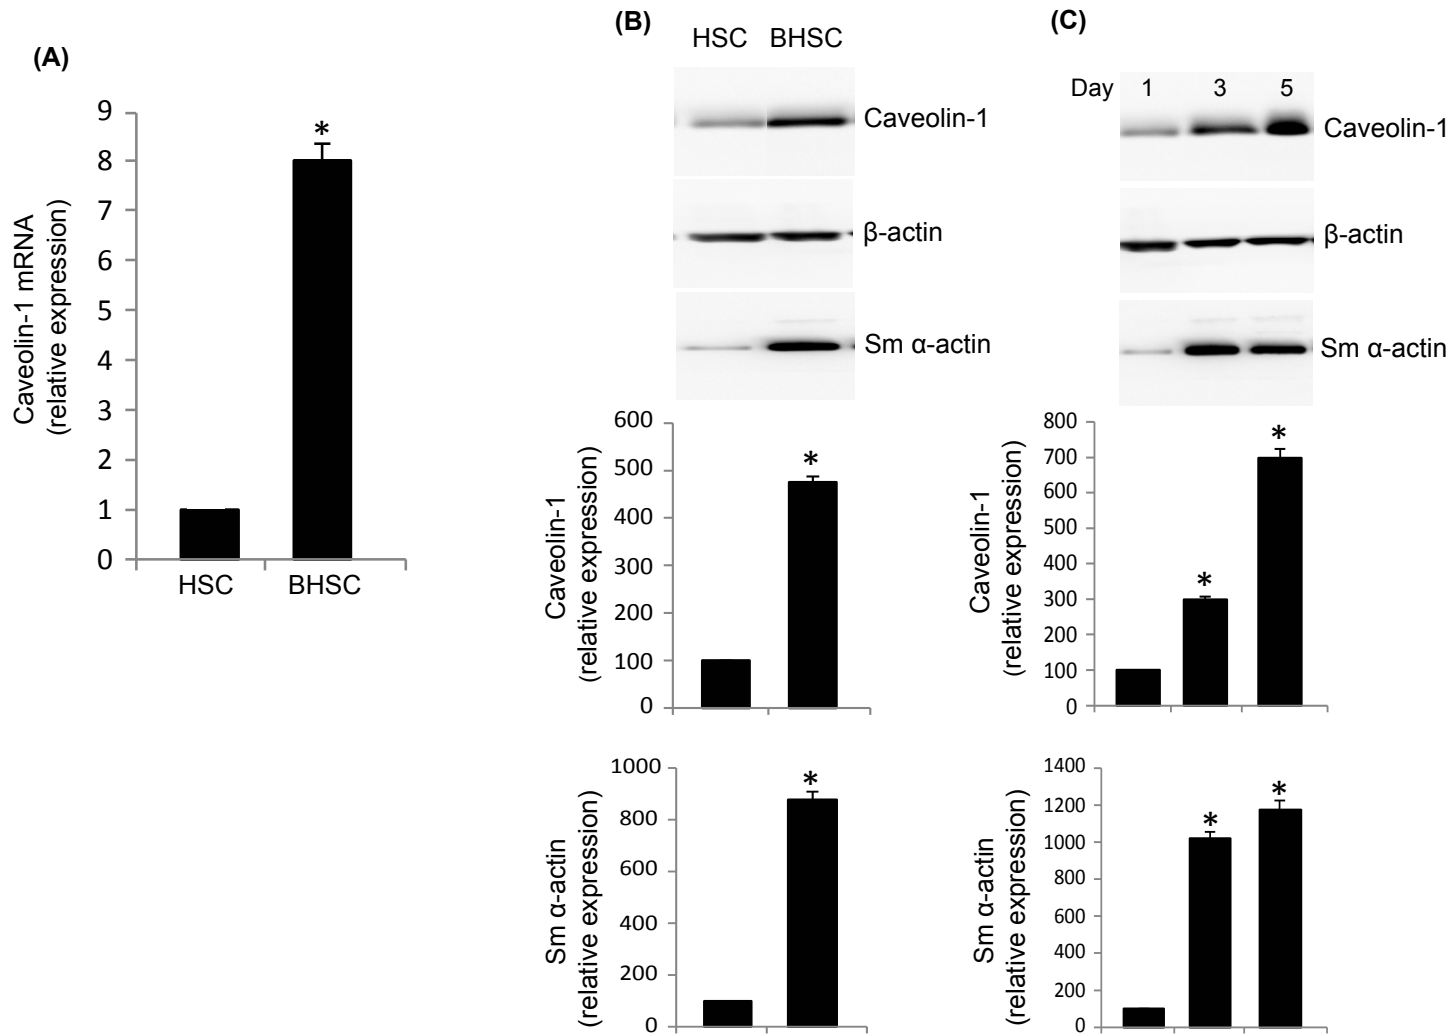

Figure 3  
Singh et al

(A)

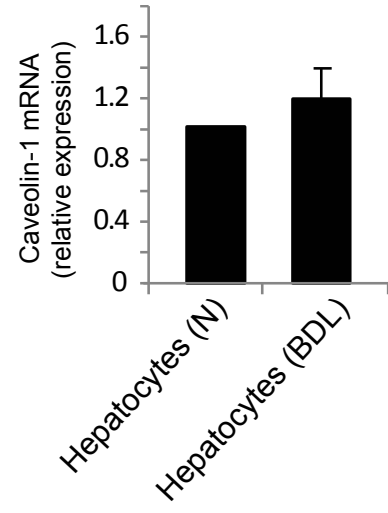

(B)

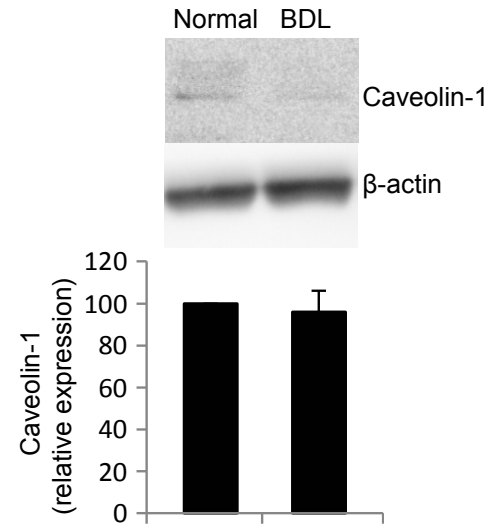

Figure 4  
Singh et al

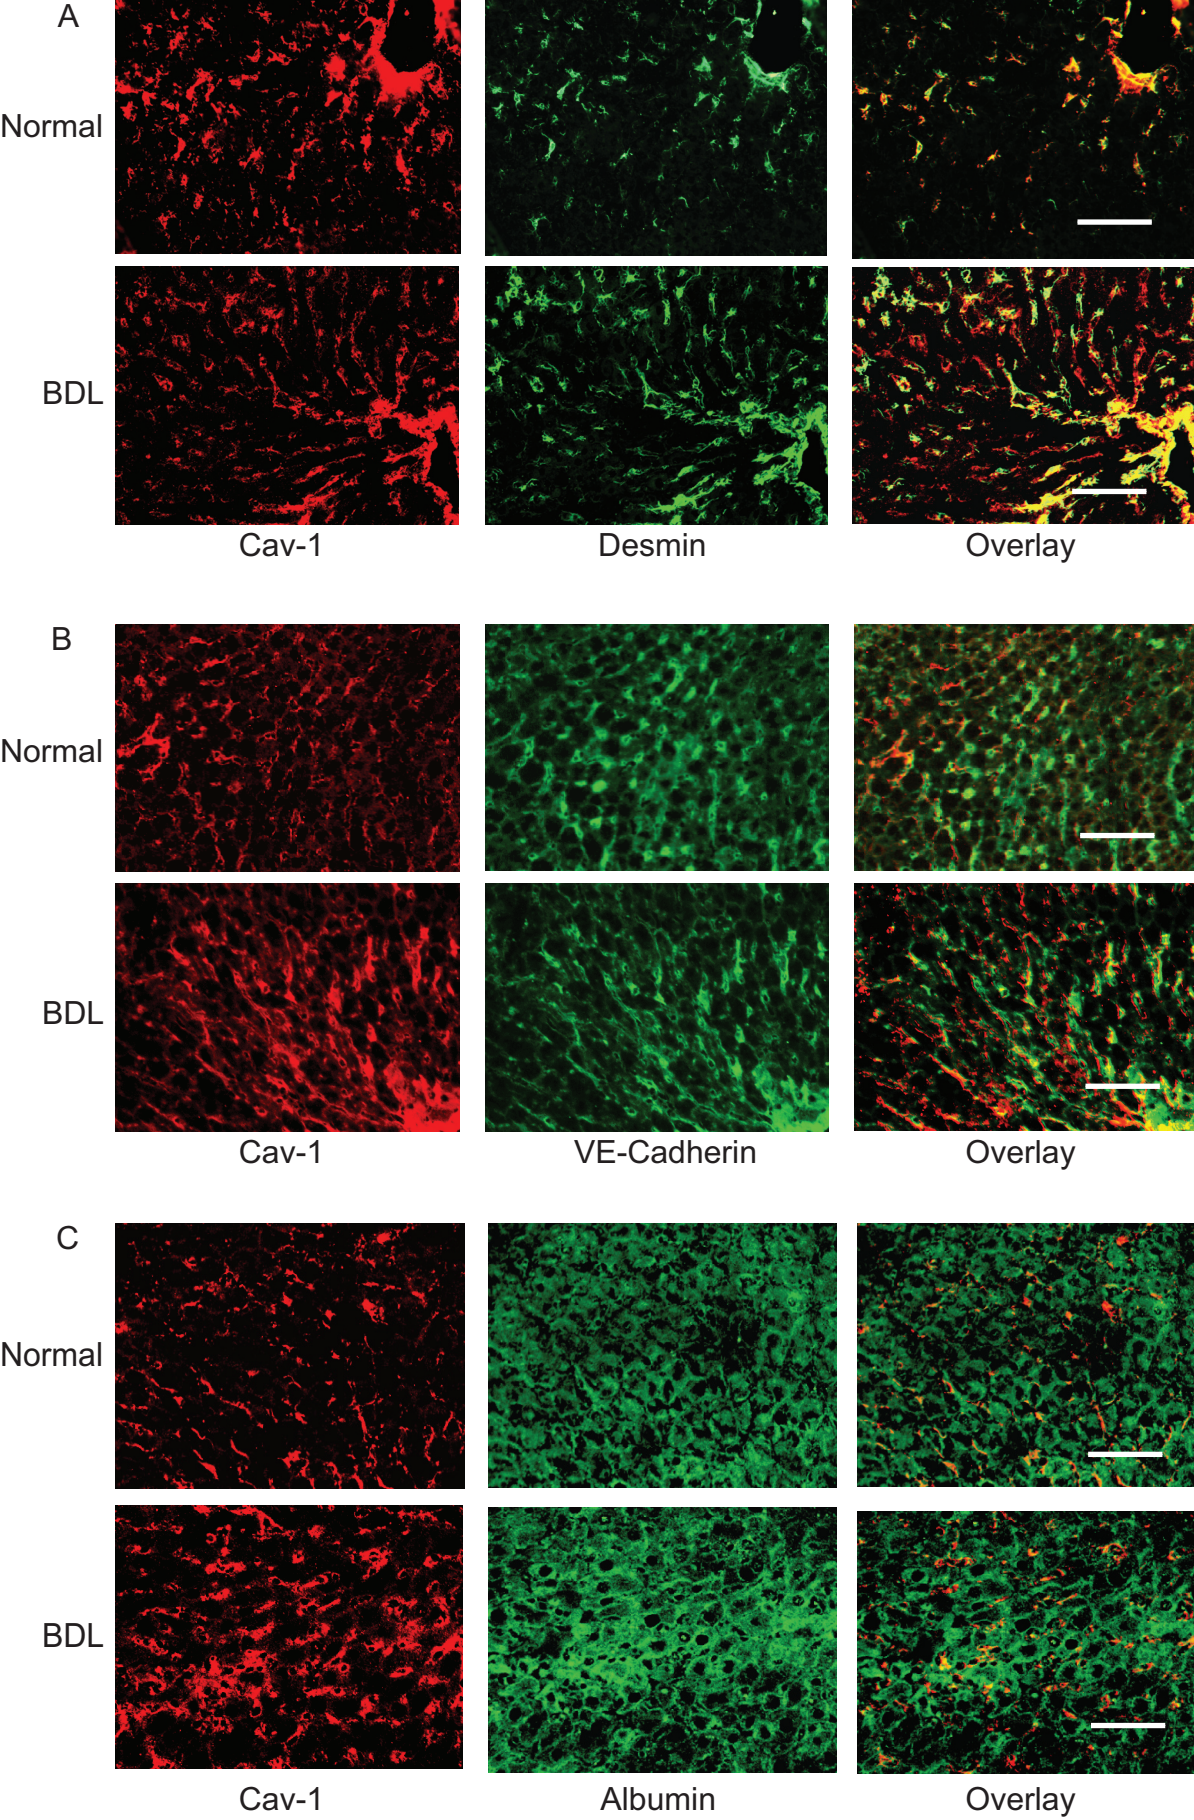

Figure 5  
Singh et al.
