# Supplementary material
Source: PubMed Central journal article supplement (PMC6475201)
Supplement: NIHMS756663-supplement-2.pdf [file NIHMS756663-supplement-2.pdf]

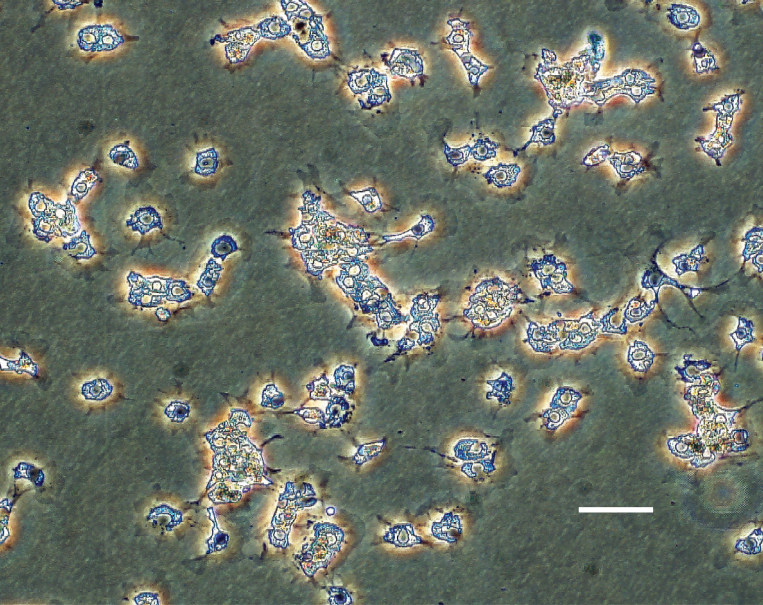

HSCs  
from normal rat liver

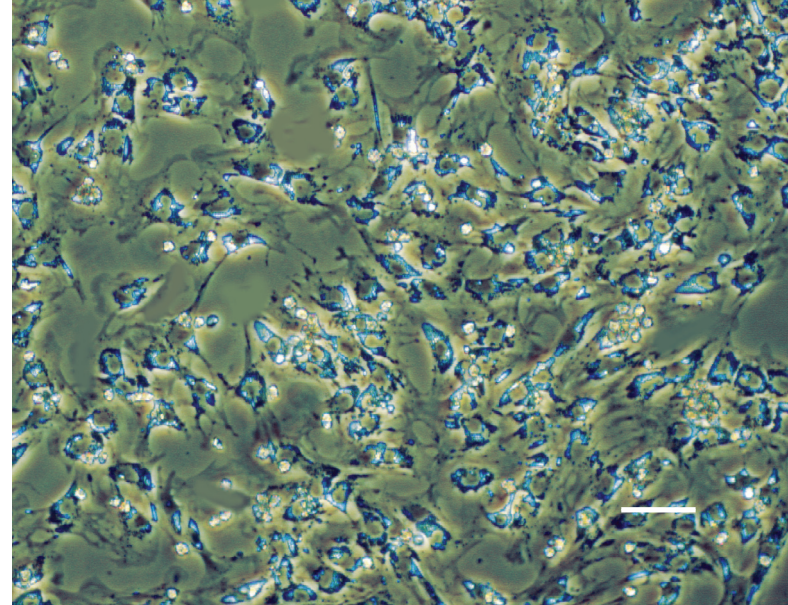

HSCs  
from BDL rat liver

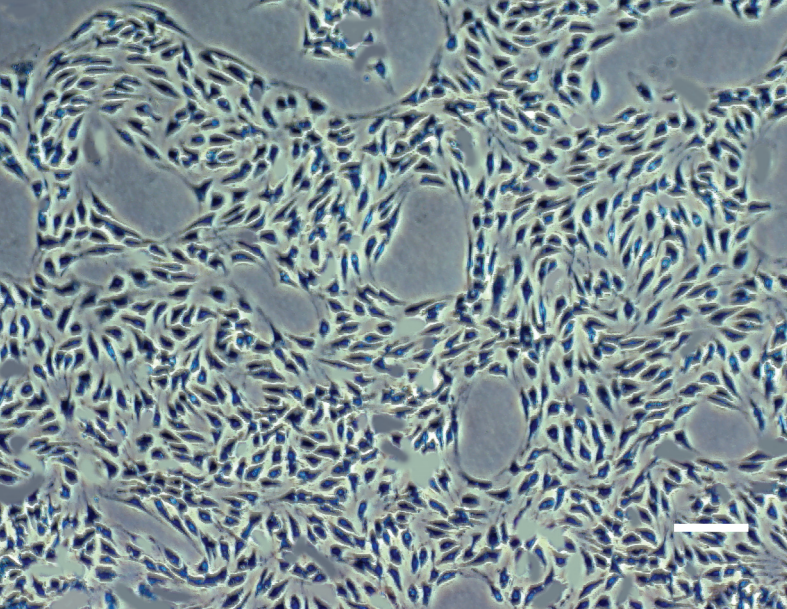

ECs  
from normal rat liver

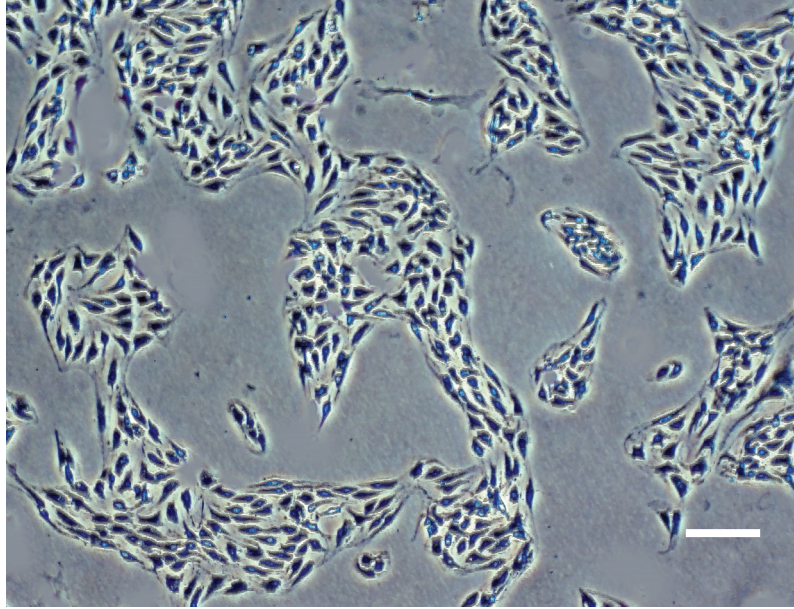

ECs  
from BDL rat liver



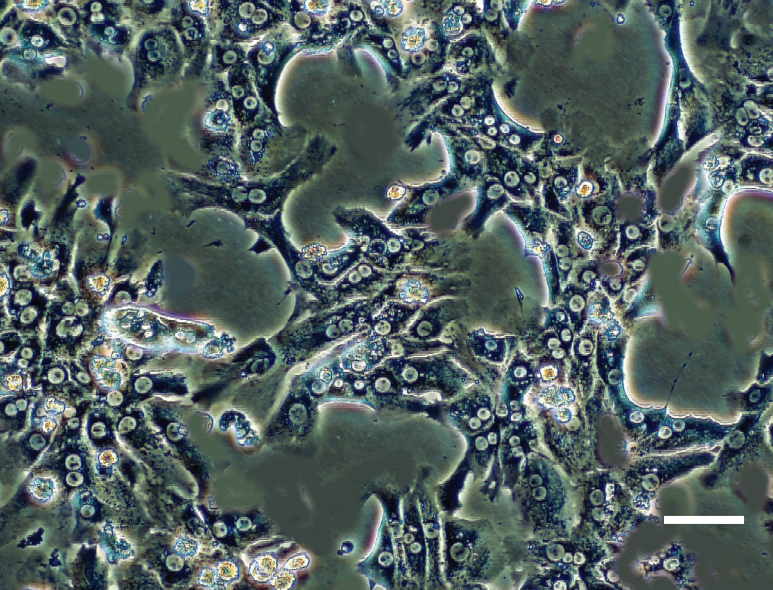

Hepatocytes  
from normal rat liver

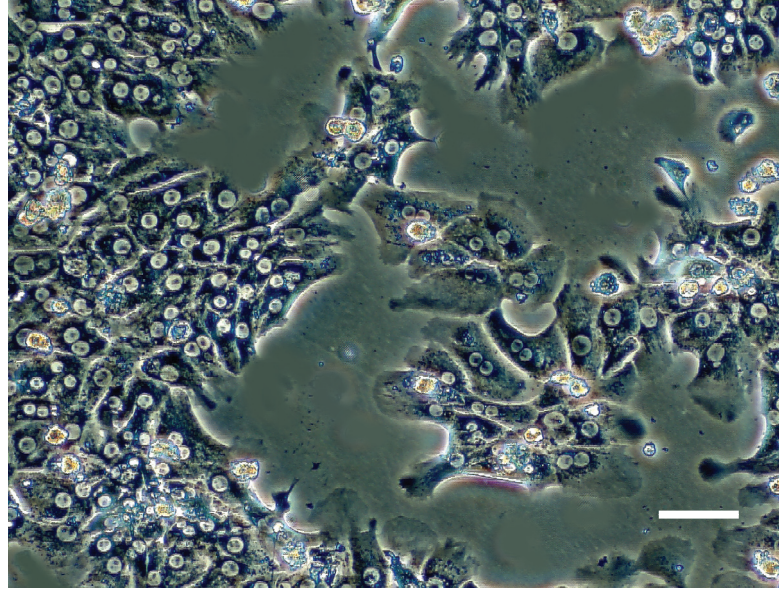

Hepatocytes  
from BDL rat liver

Supplemental Figure 3  
Singh et al.

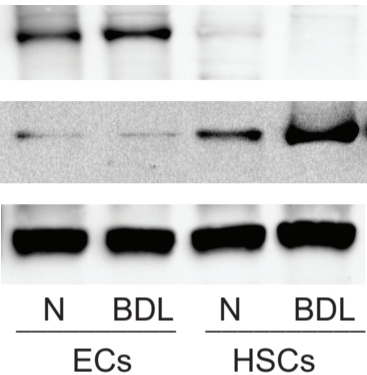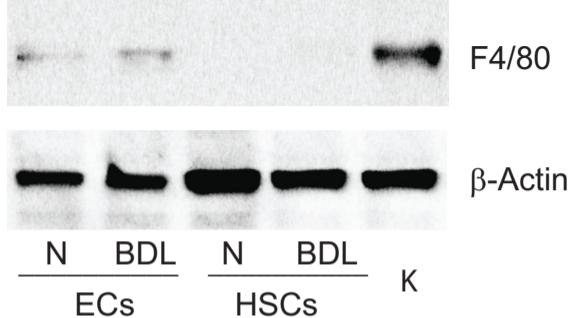

Supplemental Figure 4  
Singh et al.
